# Supplementary material
Source: publisher figshare collection journal article supplement (https://frontiersin.figshare.com/ndownloader/files/22443350)
Supplement: Supplementary file [file 22443350]

**Table S1. GO annotations and genes included in each condition**

| <b>Group</b>                                                                                                                                    | <b>Gene symbol</b> | <b>Gene name</b>                                                          |
|-------------------------------------------------------------------------------------------------------------------------------------------------|--------------------|---------------------------------------------------------------------------|
| <b>Inflammation</b>                                                                                                                             |                    |                                                                           |
| GO:0002526, acute inflammatory response;<br>GO:0001774, microglial cell activation;<br>GO:0050729, positive regulation of inflammatory response | Il1b               | Interleukine 1 beta                                                       |
|                                                                                                                                                 | Spn                | Sialophorin                                                               |
|                                                                                                                                                 | Ccl5               | C-C Motif Chemokine Ligand 5                                              |
|                                                                                                                                                 | DNase1 3           | Deoxyribonuclease gamma                                                   |
|                                                                                                                                                 | Ccr7               | C-C chemokine receptor type 7                                             |
|                                                                                                                                                 | F8                 | Coagulation factor VIII                                                   |
|                                                                                                                                                 | Il1rn              | Interlekin 1 receptor antagonist                                          |
|                                                                                                                                                 | Saa3               | Serum amyloid A 3                                                         |
|                                                                                                                                                 | Serpinf2           | Serpin family F member 2                                                  |
|                                                                                                                                                 | Sigirr             | Single immunoglobulin domain-containing IL1R-related protein              |
|                                                                                                                                                 | Clu                | Clusterin                                                                 |
|                                                                                                                                                 | Ager               | Advanced glycosylation end product-specific receptor                      |
|                                                                                                                                                 | Mapt               | Microtubule-associated protein tau                                        |
| <b>Potassium channels</b>                                                                                                                       |                    |                                                                           |
|                                                                                                                                                 | Kcna2              | Potassium Voltage-Gated Channel Subfamily A Member 2                      |
|                                                                                                                                                 | Kcna3              | Potassium Voltage-Gated Channel Subfamily A Member 3                      |
|                                                                                                                                                 | Kcnb2              | Potassium Voltage-Gated Channel Subfamily B Member 2                      |
|                                                                                                                                                 | Kcnd2              | Potassium Voltage-Gated Channel Subfamily D Member 2                      |
|                                                                                                                                                 | Kcnd3              | Potassium Voltage-Gated Channel Subfamily D Member 3                      |
|                                                                                                                                                 | Kcnc2              | Potassium Voltage-Gated Channel Subfamily C Member 2                      |
|                                                                                                                                                 | Kcnh3              | Potassium Voltage-Gated Channel Subfamily H Member 3                      |
|                                                                                                                                                 | Kcnh1              | Potassium Voltage-Gated Channel Subfamily H Member 1                      |
|                                                                                                                                                 | Kcnh4              | Potassium Voltage-Gated Channel Subfamily H Member 4                      |
|                                                                                                                                                 | Kcnh7              | Potassium Voltage-Gated Channel Subfamily H Member 7                      |
|                                                                                                                                                 | Kcnj3              | Potassium Inwardly Rectifying Channel Subfamily J Member 3                |
|                                                                                                                                                 | Kcnj10             | Potassium Inwardly Rectifying Channel Subfamily J Member 10               |
|                                                                                                                                                 | Kcnj15             | Potassium Inwardly Rectifying Channel Subfamily J Member 15               |
|                                                                                                                                                 | Kcnk1              | Potassium Two Pore Domain Channel Subfamily K Member 1                    |
|                                                                                                                                                 | Kcnk2              | Potassium Two Pore Domain Channel Subfamily K Member 2                    |
|                                                                                                                                                 | Kcnk7              | Potassium Two Pore Domain Channel Subfamily K Member 7                    |
|                                                                                                                                                 | Kcnn2              | Potassium Calcium-Activated Channel Subfamily N Member 2                  |
|                                                                                                                                                 | Kcnn3              | Potassium Calcium-Activated Channel Subfamily N Member 3                  |
|                                                                                                                                                 | Kcnrg              | Potassium Channel Regulator                                               |
|                                                                                                                                                 | Kcnv1              | Potassium Voltage-Gated Channel Modifier Subfamily V Member 1             |
|                                                                                                                                                 | Kcnip2             | Potassium Voltage-Gated Channel Interacting Protein 2                     |
|                                                                                                                                                 | Kcnmb1             | Potassium Calcium-Activated Channel Subfamily M Regulatory Beta Subunit 1 |
|                                                                                                                                                 | Kcnmb4             | Potassium Calcium-Activated Channel Subfamily M Regulatory Beta Subunit 4 |
|                                                                                                                                                 | Kcnq2              | Potassium Voltage-Gated Channel Subfamily Q Member 2                      |

|       |                                                         |
|-------|---------------------------------------------------------|
| Kcnq3 | Potassium Voltage-Gated Channel Subfamily Q Member 3    |
| Kcnt1 | Potassium Sodium-Activated Channel Subfamily T Member 1 |

---

**Calcium related pathways**

|                                                                                           |        |                                                                    |
|-------------------------------------------------------------------------------------------|--------|--------------------------------------------------------------------|
| GO:0051209,<br>release of<br>sequestered<br>calcium into<br>cytosol                       | Htr2a  | 5-Hydroxytryptamine (serotonin) receptor 2a                        |
|                                                                                           | Htr2b  | 5-Hydroxytryptamine (serotonin) receptor 2b                        |
|                                                                                           | Ryr1   | Ryanodine receptor 1                                               |
|                                                                                           | Ryr2   | Ryanodine receptor 2                                               |
|                                                                                           | Ryr3   | Ryanodine receptor 3                                               |
|                                                                                           | Plcd4  | Phospholipase C, delta 4                                           |
|                                                                                           | Plcb1  | Phospholipase C, beta 1                                            |
|                                                                                           | Plcd3  | Phospholipase C, delta 3                                           |
|                                                                                           | Plch2  | Phospholipase C, eta 2                                             |
|                                                                                           | Plch1  | Phospholipase C, eta 1                                             |
|                                                                                           | Lck    | Lymphocyte protein tyrosine kinase                                 |
|                                                                                           | Xcr1   | Chemokine (C motif) receptor 1                                     |
|                                                                                           | Bbc3   | BCL2 binding component 3                                           |
| GO:0035584,<br>calcium-<br>mediated<br>signaling using<br>intracellular<br>calcium source | Kdr    | kinase insert domain protein receptor                              |
|                                                                                           | Homer2 | homer scaffolding protein 2                                        |
|                                                                                           | Ryr2   | Ryanodine receptor 2                                               |
|                                                                                           | Selp   | Selectin, platelet                                                 |
|                                                                                           | Ntrk2  | Neurotrophic tyrosine kinase, receptor, type 2                     |
| GO:0007204,<br>positive<br>regulation of<br>cytosolic<br>calcium ion<br>concentration     | Cacnb4 | Calcium channel, voltage-dependent, L type, beta 4 subunit         |
|                                                                                           | Ccl28  | Chemokine (C-C motif) ligand 28                                    |
|                                                                                           | Cav1   | Caveolin 1                                                         |
|                                                                                           | Synpo  | Synaptopodin                                                       |
|                                                                                           | Gper1  | G protein-coupled estrogen receptor 1                              |
|                                                                                           | Bak1   | BCL2 Antagonist/Killer 1                                           |
|                                                                                           | Trpv6  | Transient receptor potential cation channel, subfamily V, member 6 |
|                                                                                           | Xcr1   | Chemokine (C motif) receptor 1                                     |
